# Supplementary material for: Rederivation by Cryopreservation of a Paternal Line of Rabbits Suggests Exhaustion of Selection for Post-Weaning Daily Weight Gain after 37 Generations
Source: MDPI journal article supplement (doi:10.3390/ani10081436), 2020-08-17
Supplement: s1 [file s1]

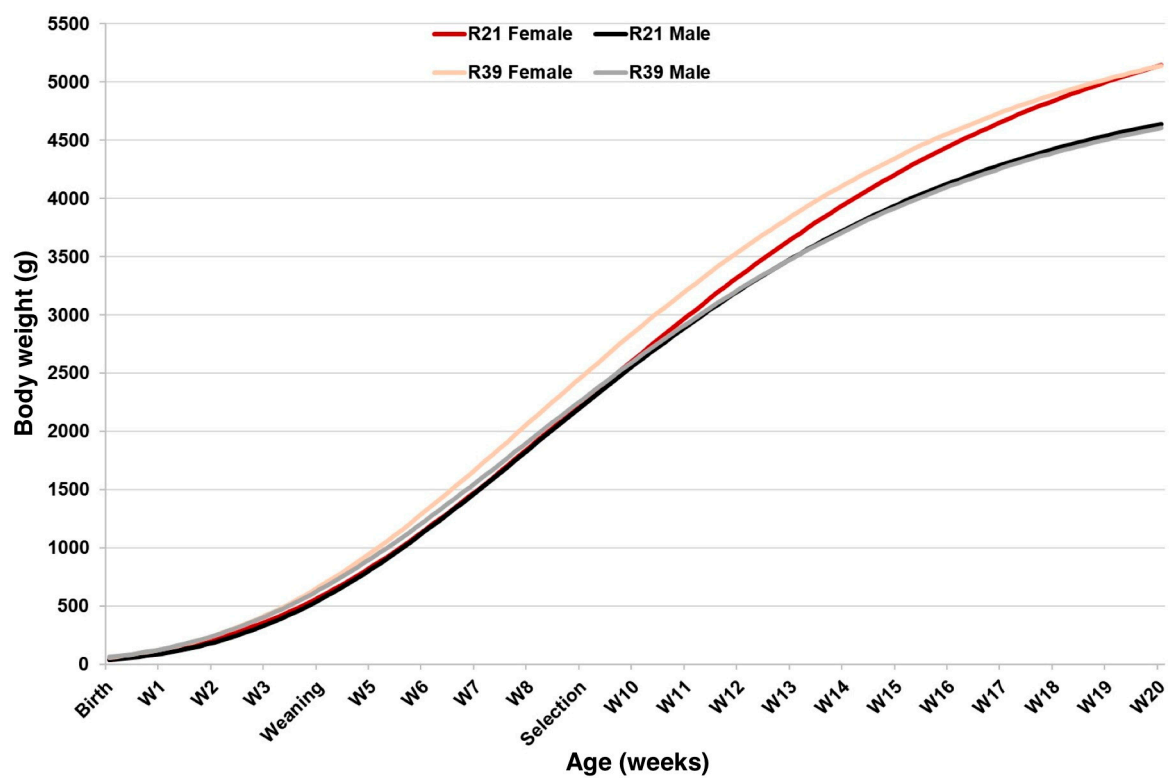

**Figure S1.** Gompertz growth curve from birth to 20-week-old for interaction between populations and sex of animals.
